# Supplementary material for: Linear-Shaped Low-Bandgap Asymmetric Conjugated Donor Molecule for Fabrication of Bulk Heterojunction Small-Molecule Organic Solar Cells
Source: MDPI journal article supplement (doi:10.3390/molecules28041538), 2023-02-05
Supplement: s1 [file s1]

## Supporting Information

# Linear-Shaped Low-Bandgap Asymmetric Conjugated Donor Molecule for Fabrication of Bulk Heterojunction Small-Molecule Organic Solar Cells

Abdullah <sup>1</sup>, Sei-Jin Lee <sup>1,\*</sup>, Jong Bae Park <sup>1</sup>, Yang Soo Kim <sup>1</sup>, Hyung-Shik Shin <sup>2</sup>, Ashique Kotta <sup>3,4</sup>, Qamar Tabrez Siddiqui <sup>3</sup>, Youn-Sik Lee <sup>3,\*</sup>, Hyung-Kee Seo <sup>3,4,\*</sup>

<sup>1</sup>Korea Basic Science Institute (KBSI), Jeonju Center, Jeonju, 54896, Republic of Korea

<sup>2</sup>Korea Basic Science Institute (KBSI), Daejeon, 34133, Republic of Korea

<sup>3</sup>School of Chemical Engineering, Jeonbuk National University, Jeonju, 54896, Republic of Korea

<sup>4</sup>Future Energy Convergence Core Center, Jeonbuk National University, Jeonju, 54896, Republic of Korea

\* Correspondence: [lsj@kbsi.re.kr](mailto:lsj@kbsi.re.kr) (S.-J.L.); [hkseo@jbnu.ac.kr](mailto:hkseo@jbnu.ac.kr) (H.-K.S.); [yosklear@jbnu.ac.kr](mailto:yosklear@jbnu.ac.kr) (Y.-S.L.);

Fax: +82-63-270-4097 (H.-K.S.)

\*Correspondence: [lsj@kbsi.re.kr](mailto:lsj@kbsi.re.kr) (S.-J.L.); [hkseo@jbnu.ac.kr](mailto:hkseo@jbnu.ac.kr) (H.-K.S.); [yosklear@jbnu.ac.kr](mailto:yosklear@jbnu.ac.kr) (Y.-S.L.), Fax: +82-63-270-4097 (H.-K.S.)

### S1.1: Synthesis of intermediate 4,7-dibromobenzothiadiazole (2)

In a 250 ml two-neck flask, 2,1,3-benzothiadiazole (1) (10 g, 73.44 mmol) and 19.87 ml (13.34 g, 164.88 mmol) of 48% HBr were transferred and degassed for 10 min, followed by slow addition of 11.13 g of Br<sub>2</sub> (34.62 ml, 216.65 mmol) at 150 °C. Immediately after adding Br<sub>2</sub>, the reaction mixture starts precipitating, which is significantly assisted by further addition of 40 ml HBr and heating at the same temperature for the next 2 h. The reaction mixture was then filtered and treated with DI water several times to obtain an off-white precipitate. To remove the excess bromine from the crude, an aqueous sodium thiosulfate (10%) solution was used until the neutral pH point. The dried crude was then transferred to a beaker containing 200 ml ethyl alcohol and allowed to crystallize at room temperature. White needle-like crystals (20.8 g, yield= 96%) were obtained from the recrystallization process in a mixed solution of ethyl alcohol and chloroform. <sup>1</sup>H NMR (400 MHz, CDCl<sub>3</sub>, ppm): 7.75 (s, 2H). <sup>13</sup>C NMR (100 MHz, CDCl<sub>3</sub>, ppm): 153.1, 132.4, 113.9. MS, m/z; calculated for [C<sub>6</sub>H<sub>2</sub>Br<sub>2</sub>N<sub>2</sub>S]<sup>+</sup>:293.973, found 293.971.

### S1.2: Synthesis of monomer 4,7-dithienyl-2,1-3-benzothiadiazole (4)

Intermediate 2 (3.0 g, 10.21 mmol) was dissolved in dry tetrahydrofuran (THF; 120 ml) and purged with nitrogen for 10 min before adding 2-(tributylstannyl)thiophene (11.43 g, 30.63 mmol), followed by 3 mol% PdCl<sub>2</sub>(PPh<sub>3</sub>)<sub>2</sub>. The resultant reaction mixture was heated to reflux temperature for 24 h. The cooled reaction mixture was then poured into a separating funnel and rinsed with dichloromethane (DCM) and DI water multiple times. The obtained organic layer was transferred to a beaker and dried with portion-wise addition of anhydrous MgSO<sub>4</sub> before concentrating with a rotary evaporator. The obtained product was preabsorbed on silica gel to prepare a slurry and purified by the column chromatography technique, where hexane and ethyl acetate (10:1) were used as the eluents. The chromatograms were collected and dried to obtain the pure product (2.30 g, yield=75%) as shiny red crystals. <sup>1</sup>H NMR (400 MHz, CDCl<sub>3</sub>, ppm):7.91 (dd, 2H), 7.67 (s, 2H), 7.25 (dd, 2H), 7.01 (m, 2H). <sup>13</sup>C NMR (100 MHz, CDCl<sub>3</sub>, ppm): 152.7, 139.1, 128.2, 127.4, 126.9, 126.5, 125.7. MS, m/z; calculated for [C<sub>14</sub>H<sub>8</sub>N<sub>2</sub>S<sub>3</sub>]<sup>+</sup>:299.985, found 299.984.

### S1.3: Synthesis of 4,7-bis(5-bromothiophen-2-yl)benzo[c][1,2,5]thiadiazole (5)

Compound 5 was synthesized under dark conditions by dissolving monomer 4 (2.5 g, 8.32 mmol) in 80 ml of absolute CHCl<sub>3</sub> at 0 °C under an inert atmosphere. After complete mixing, about 3.70 g (20.8 mmol)

of NBS was added, and the reaction mixture was stirred overnight. The reaction was quenched with a small volume of DI water, and the red precipitate was filtered off and washed with excess water repeatedly. Then dry crude was first dissolved in a small portion of ethyl alcohol and then recrystallized from a solution of ethyl alcohol and chloroform to obtain dark red crystals (2.17 g, yield= 57%).  $^1\text{H}$  NMR (400 MHz,  $\text{CDCl}_3$ , ppm): 7.81 (d,  $J = 4.4$ , Hz, 2H), 7.79 (s, 2H), 7.16 (d, 3.92 Hz, 2H).  $^{13}\text{C}$  NMR (100 MHz,  $\text{CDCl}_3$ , ppm): 154.6, 138.9, 127.6, 127.1, 126.7, 125.2, 124.9. MS,  $m/z$ ; calculated for  $[\text{C}_{14}\text{H}_6\text{Br}_2\text{N}_2\text{S}_3 + \text{H}]^+$ : 458.803, found 458.807.

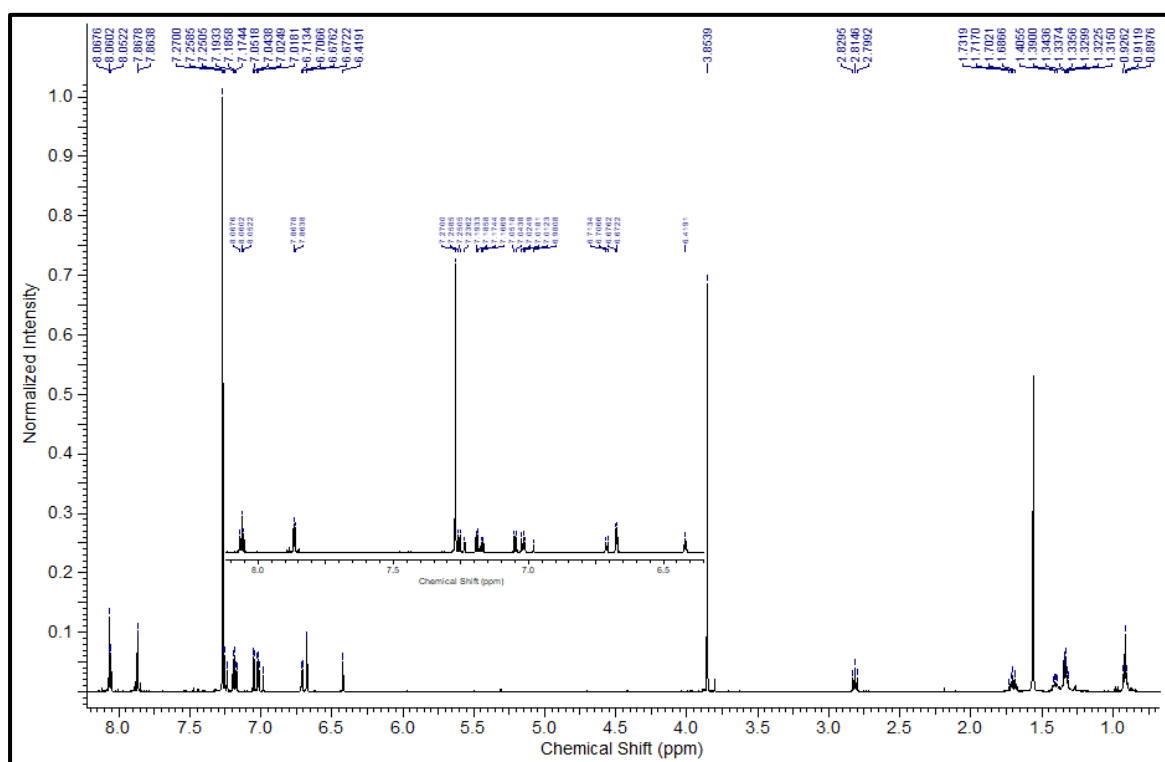

**Figure S1.**  $^1\text{H}$  NMR spectrum of the MBTR molecule.

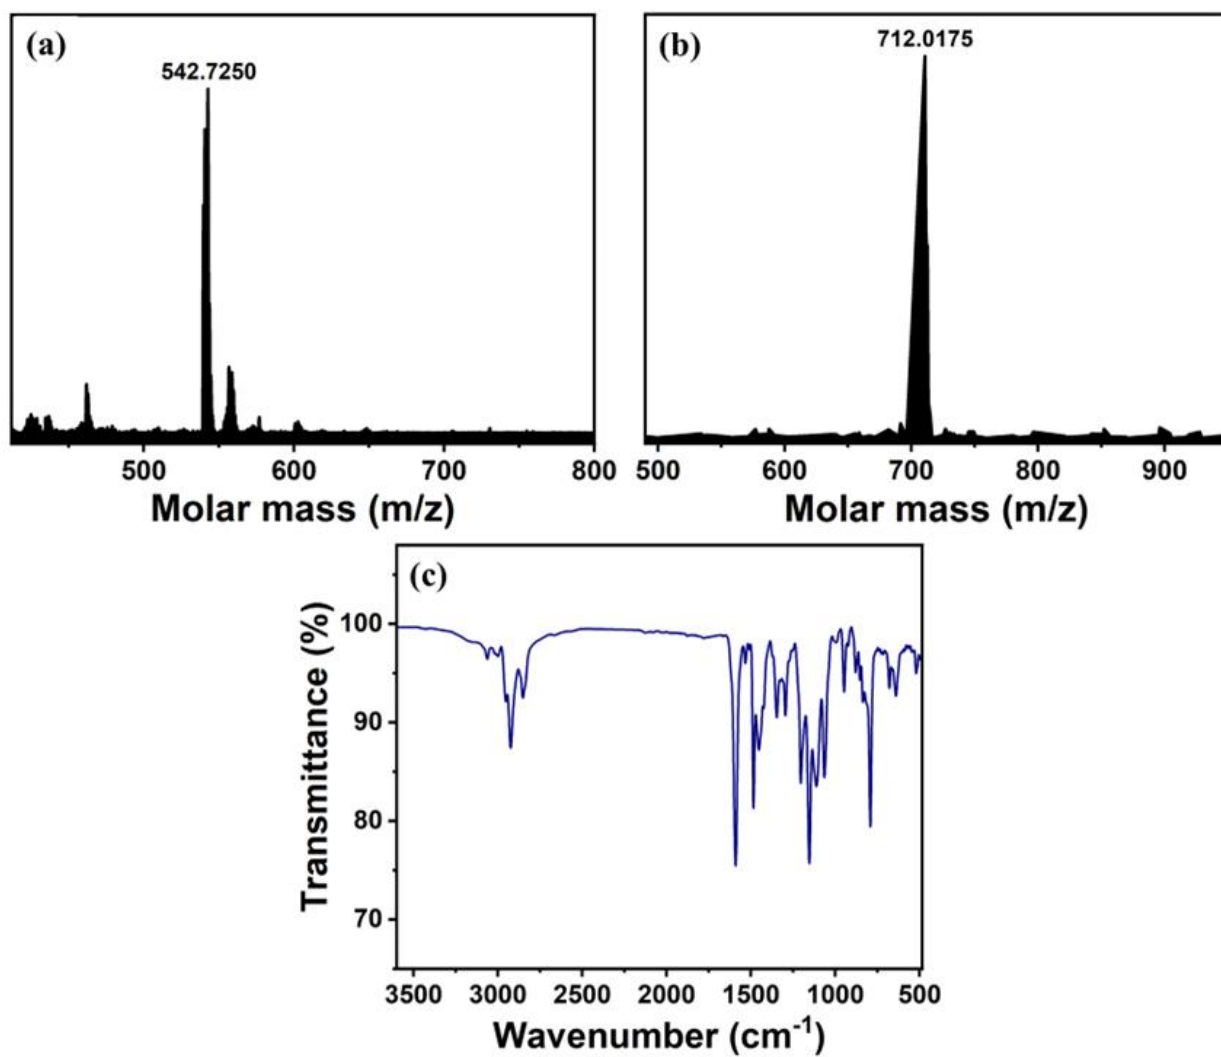

**Figure S2.** Mass spectroscopy plots of (a) intermediate 7 and (b) MBTR molecule; (c) FTIR spectra of MBTR molecule.

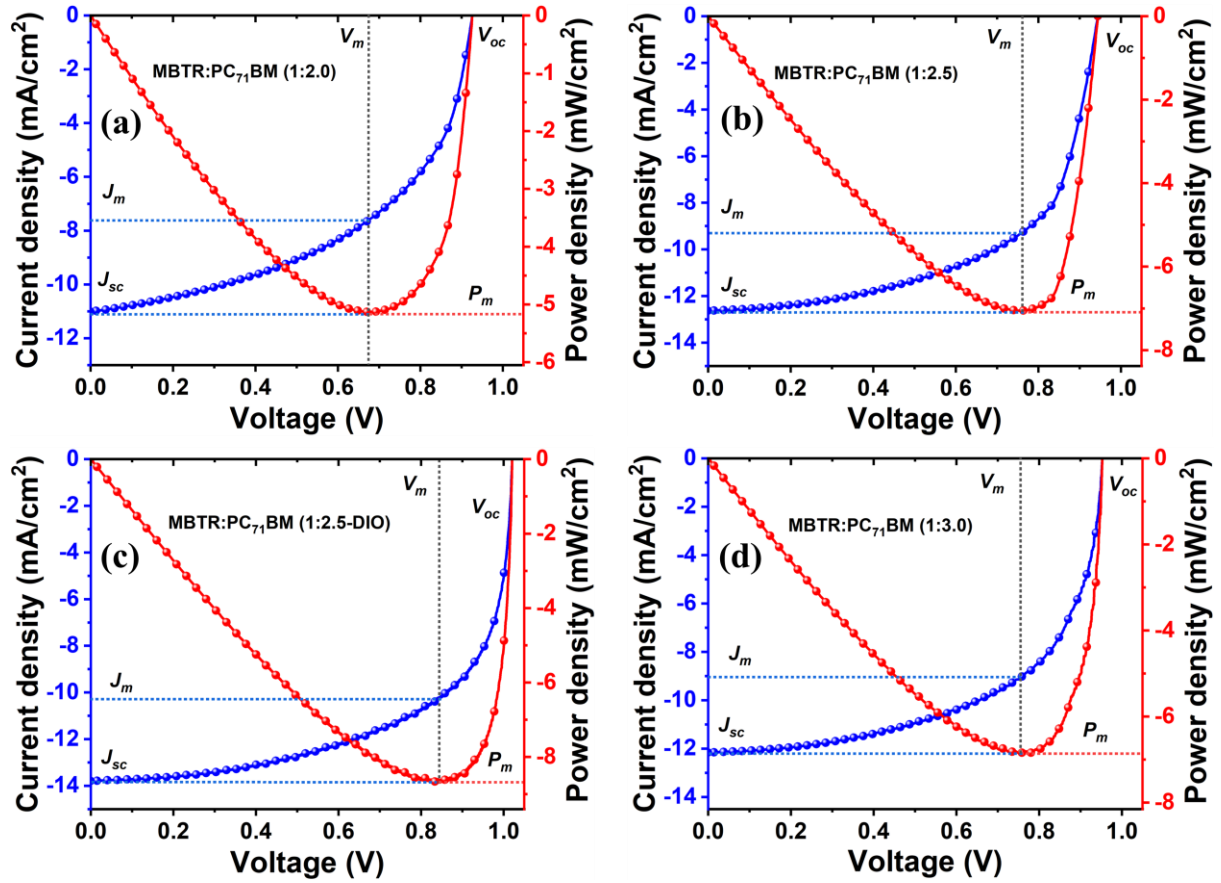

**Figure S3.** 4<sup>th</sup> quadrant I-V characteristics of BHJ OSCs with different w/w% ratio of MBTR:PC<sub>71</sub>BM; (a) MBTR:PC<sub>71</sub>BM (1:2.0), (b) MBTR:PC<sub>71</sub>BM (1:2.5), (c) MBTR:PC<sub>71</sub>BM (1:2.5) with DIO and (d) MBTR:PC<sub>71</sub>BM (1:3.0).

## S.2 FF of BHJ OSCs

The accuracy of FF for organic devices is investigated by the fourth quadrant I-V characteristics of MBTR:PC<sub>71</sub>BM with the varying donor: acceptor (w/w% ratio) content under the illumination of 1.5 A.M. at 100 mW/cm<sup>2</sup>. FF is characterized as maximum electrical power ( $P_m$ ) from the solar device at the maximum voltage ( $V_m$ ) and current ( $J_m$ ) associated to the product of  $V_{oc}$  and  $J_{sc}$  [1-3]. The FF is calculated from the expression:

$$FF = \frac{V_m J_m}{V_{oc} J_{sc}} \times 100$$

where  $P_m = V_m J_m$

The PCE can be expressed by the following equation:

$$PCE = \frac{FF V_{oc} J_{sc}}{P_{light}}$$

The  $P_m$  is calculated with the help of the fourth quadrant I-V curve using the equation as 5.15 mW/cm<sup>2</sup>, 7.05 mW/cm<sup>2</sup>, 8.77 mW/cm<sup>2</sup> and 6.82 mW/cm<sup>2</sup> for MBTR:PC<sub>71</sub>BM (1:2.0), MBTR:PC<sub>71</sub>BM (1:2.5), MBTR:PC<sub>71</sub>BM (1:2.5) with DIO and MBTR:PC<sub>71</sub>BM (1:3.0).

## References

1. Lucian, I.; Ionut, E.; Sorina, I.; Veta, G.; Cezar, T.; Cristina, B.; Todor, L.M.; Vlad, A.A.; Marin, M.G.; Stefan, A. Effects of Proton Irradiation on the Spectral Performance of Photovoltaic Cells Based on CdS/CdTe Thin Films. *Chalcogenide Letters* 2010, 7(8), 2010, 521 -530.
2. Adrian, R.; Sorina, I.; Veta, G.; Cristina, B.; Vlad, A.A.; Gvido, B.; Lucian, I.; Simona, C.; Mihaela, G.; Stefan A. The Influence of LiF Layer and ZnO Nanoparticles Addings on the Performances of Flexible Photovoltaic Cells Based on Polymer Blends. *Digest Journal of Nanomaterials and Biostructures* 2011, 6 (3), 1141-1148.
3. Stefan, A.; Sorina, I.; Laura, H.; Vlad, A.A.; Mihaela, G. A Critical Review of Photovoltaic Cells Based on Organic Monomeric and Polymeric Thin Film Heterojunctions. *Thin Solid Films* 2017, 642, 219–231.
